# Supplementary material for: Sustainability Strategies of Equipment Introduction and Overcapacity Risk Sharing in Mask Emergency Supply Chains during Pandemics
Source: MDPI journal article supplement (doi:10.3390/su131810355), 2021-09-16
Supplement: s1 [file s1]

1. What is the full name or abbreviation of the financial leasing institution you work for? [Fill in the blank]

\_\_\_\_\_

2. What is your position in the financial leasing institution?

- ☐ top managers
- ☐ leaders of business unit
- ☐ leaders of risk control department
- ☐ Leaders of other departments
- ☐ General manager of business unit and risk control department
- ☐ others

3. How long have you worked in the field of financial leasing?

- ☐ less than 2 years
- ☐ 2-5 years
- ☐ 5-10 years
- ☐ more than 10 years

4. Please answer your understanding of the field of masks ("1" means completely unknown, "5" means complete understanding)

1   2   3   4   5

Understanding of the mask industry   ☐   ☐   ☐   ☐   ☐

Understanding of mask manufacturers   ☐   ☐   ☐   ☐   ☐

Understanding of mask production equipment   ☐   ☐   ☐   ☐   ☐

Understanding of mask market   ☐   ☐   ☐   ☐   ☐

5. Do you think financial leasing institutions should support mask manufacturers to acquire equipment and expand production capacity to deal with the global pandemic?

- ☐ Yes
- ☐ No
- ☐ DK

6. What are the factors that weaken your willingness to provide financing support for mask manufacturers to introduce equipment and expand production capacity? [select one or more answer choices]

- ☐ The scale of mask manufacturers is limited
- ☐ Insufficient disclosure of relevant information in the field of masks
- ☐ mask manufacturers lack mortgages and insufficient credit lines
- ☐ Transaction costs (including taxes and fees) are too high
- ☐ Ownership structure of mask manufacturers
- ☐ other reasons

7. If the introduction of equipment by mask manufacturers is supported by the government, will it increase your willingness to provide financing support for mask manufacturers?

- ☐ Yes
- ☐ No
- ☐ DK

8. Which of the following support measures will the government take to increase your willingness to provide financing support for mask manufacturers to introduce equipment and expand production capacity? (Multiple choice)

- ☐ Provide financial subsidies
- ☐ Provide financing guarantee
- ☐ Simplify the approval process and reduce or exempt relevant taxes and fees
- ☐ other measures

9. Do you think that after the COVID-19 epidemic is over, the market demand for masks will basically return to the level before the pandemic?

- ☐ Yes
- ☐ No
- ☐ DK

10. Please answer your concerns about the risk of overproduction after the mask manufacturer introduces equipment and expands production capacity (1 is not worried at all, 5 is completely worried)

- ☐ 1
- ☐ 2
- ☐ 3
- ☐ 4
- ☐ 5

11. If the government provides support for mask manufacturers to introduce equipment and expand production capacity, will it alleviate your concerns about the risk of overproduction of masks?

- ☐ Yes
- ☐ No
- ☐ DK

12. What kind of leasing model do you think should be adopted to support mask manufacturers to expand their production scale?

- ☐ direct leasing
- ☐ leaseback
- ☐ operating leasing
- ☐ others \_\_\_\_\_
